# Supplementary material
Source: PubMed Central journal article supplement (PMC5010867)
Supplement: NIHMS812202-supplement-Supplemental_INformation.pdf [file NIHMS812202-supplement-Supplemental_INformation.pdf]

# Sodium Hydroxide Catalyzed Monodispersed High Surface Area Silica Nanoparticles

Snehasis Bhakta<sup>†,Δ</sup>, Chandra K. Dixit<sup>\*,†,Δ</sup>, Itti Bist<sup>†</sup>, Karim Abdel Jalil<sup>†</sup>, Steven L. Suib<sup>†,§</sup>, James F. Rusling<sup>†,§,⊥,||</sup>

---

<sup>†</sup>*Department of Chemistry, University of Connecticut, Storrs, Connecticut 06269-3060*

<sup>§</sup>*Institute of Materials Science, University of Connecticut, Storrs, Connecticut 06269-3136*

<sup>⊥</sup>*Department of Cell Biology, University of Connecticut Health Center, Farmington, Connecticut 06030*

<sup>||</sup>*School of Chemistry, National University of Ireland at Galway, Galway, Ireland*

<sup>Δ</sup>Authors contributed equally

Corresponding author: chandra.kumar\_dixit@uconn.edu

## Abstract

Understanding of the synthesis kinetics and our ability to modulate medium conditions allowed us to generate nanoparticles via an ultra-fast process. The synthesis medium is kept quite simple with tetraethyl orthosilicate (TEOS) as precursor and 50% ethanol and sodium hydroxide catalyst. Synthesis is performed under gentle conditions at 20 °C for 20 minutes. Long synthesis time and catalyst-associated drawbacks are most crucial in silica nanoparticle synthesis. We have addressed both these bottlenecks by replacing the conventional Stober catalyst, ammonium hydroxide, with sodium hydroxide. We have reduced the overall synthesis time from 20 h to 1/3 h, ~60-fold decrease, and obtained highly monodispersed nanoparticles with 5-fold higher surface area than Stober particles. We have demonstrated that the developed NPs with ~3-fold higher silane can be used as efficient probes for biosensor applications.

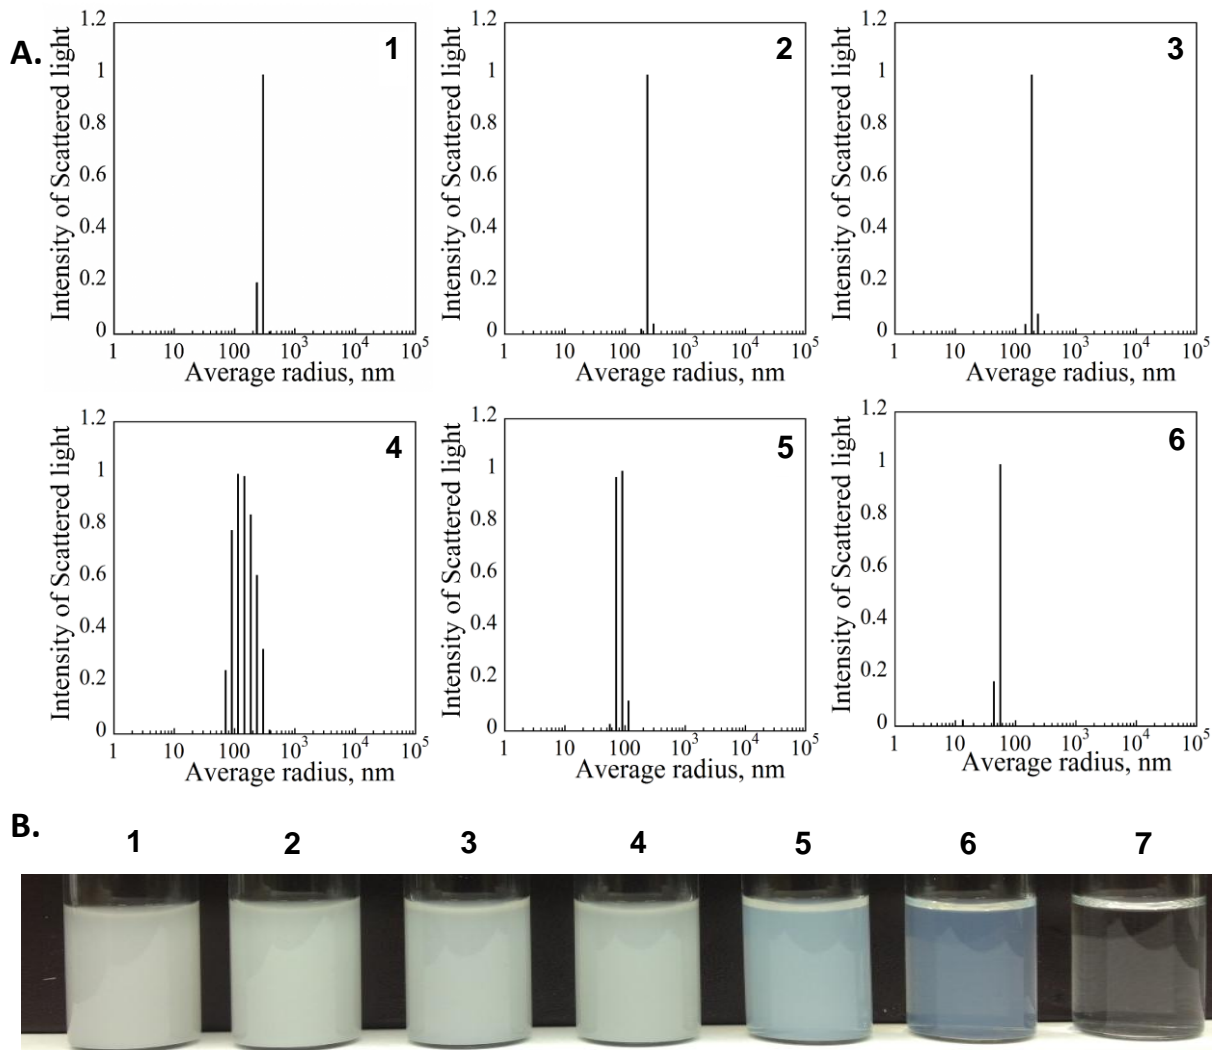

**SI Figure 1.** **A.** Dynamic Light Scattering analyses-based NP population distribution along various sizes for different NaOH concentrations. **B.** Images of different SiNPs as per the sequence from ‘A’. The sizes of the particles decrease from 1 to 7. Samples 1 to 7 correspond to formulations with different NaOH concentrations ranging 20 mM to 0, respectively.

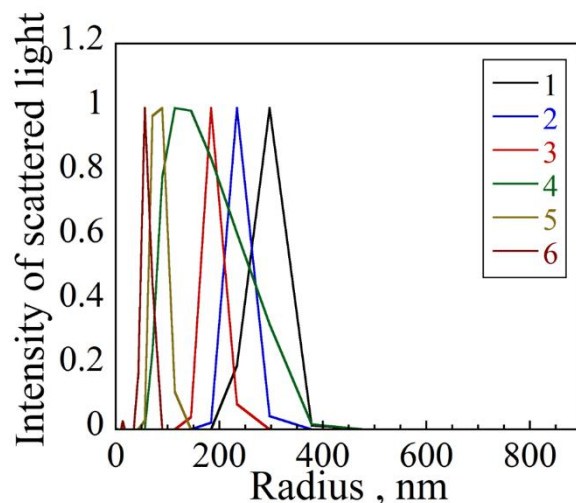

**SI Figure 2.** Average radius of different silica nanoparticles obtained from dynamic light scattering.

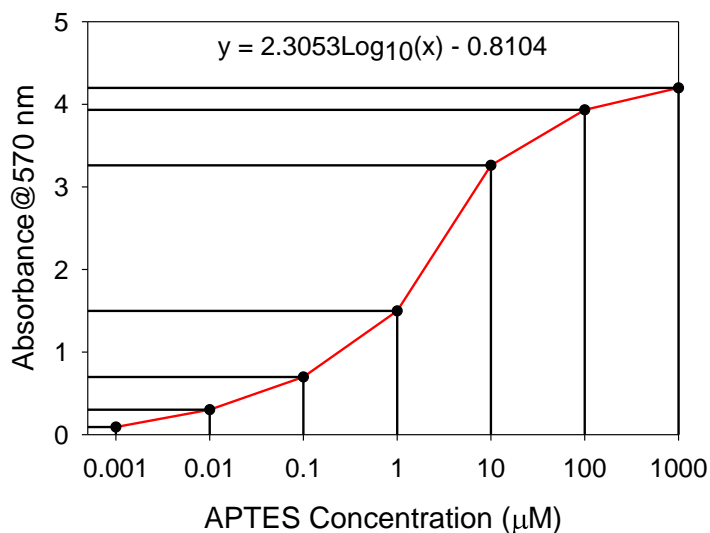

**SI Figure 3.** Standard curve for analyzing data obtained with ninhydrin on silanized SiNPs. Various known concentrations of APTES were prepared by directly diluting stock APTES concentration in 100 µL ninhydrin (20 mg/mL) followed by incubating at 100 °C for 10 min. Absorbance was recorded for each sample at 570 nm against ethanol background.

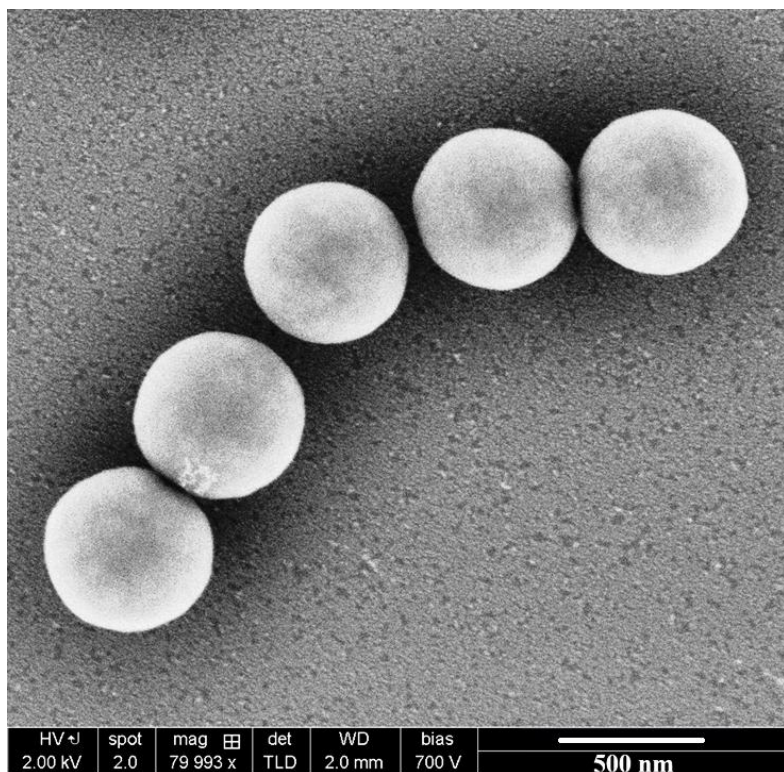

**SI Figure 4.** Scanning micrograph of Stober nanoparticles.

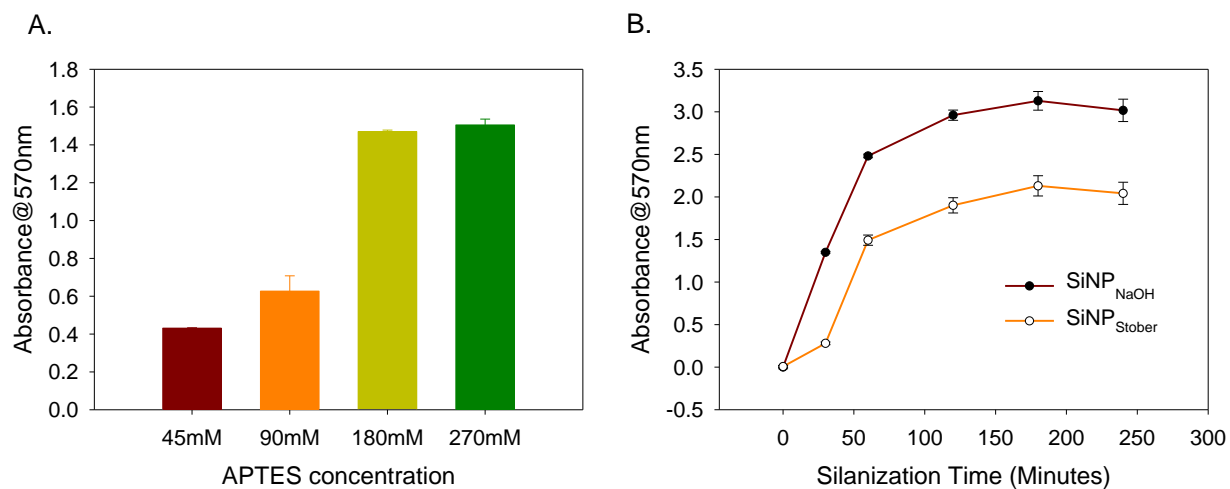

**SI Figure 5.** Ninhydrin assay for silanization optimization. (A) Stober particles with four different APTES concentrations. Optimized APTES concentration of 180 mM was employed for analyzing APTES loading efficiency on NaOH- and Stober Silica nanoparticles (B).

Table 1: Different synthesis procedure of silica nanoparticles with their advantages and disadvantages

| Method                                                                    | Advantages                                                                                                                                              | Disadvantages                                                                                                                                                                                         |
|---------------------------------------------------------------------------|---------------------------------------------------------------------------------------------------------------------------------------------------------|-------------------------------------------------------------------------------------------------------------------------------------------------------------------------------------------------------|
| Reverse microemulsion <sup>1,2</sup>                                      | <ul style="list-style-type: none"> <li>• Coating with different functional groups</li> <li>• Mesoporous</li> <li>• Precise control over size</li> </ul> | <ul style="list-style-type: none"> <li>• Lengthy post processing (removal of surfactants) and sample work outs</li> <li>• High cost</li> </ul>                                                        |
| Chemical vapor condensation <sup>3,4</sup>                                | <ul style="list-style-type: none"> <li>• Synthesized in powder form</li> <li>• Can be synthesized in bulk amount, thus useful in industries</li> </ul>  | <ul style="list-style-type: none"> <li>• Hard to control morphology (size and shape)</li> <li>• Poor control of phase composition</li> <li>• Powder exposure; Health risk</li> </ul>                  |
| Sol-gel: Stober and modified method, ammonia as catalyst <sup>5,6,7</sup> | <ul style="list-style-type: none"> <li>• Mild condition</li> <li>• Pure and homogeneous particles</li> </ul>                                            | <ul style="list-style-type: none"> <li>• Time</li> <li>• Reproducibility due to ammonia</li> <li>• Removal of ammonia</li> <li>• Sometimes controlling the size</li> </ul>                            |
| Microwave-assisted heating <sup>8,9,10</sup>                              | <ul style="list-style-type: none"> <li>• Fast synthesis</li> <li>• Can be employed in industry using continuous flow reactor</li> </ul>                 | <ul style="list-style-type: none"> <li>• Microwave exposure; Health risk</li> <li>• High cost</li> <li>• Poor control over size and shape of particles</li> <li>• Poor solvent penetration</li> </ul> |

Table 2: Optimization of water-ethanol concentration for the synthesis of sodium hydroxide mediated silica nanoparticle: NaOH concentration: 20 mM, TEOS concentration 90 mM\*

| Volumetric Ratio (Water : Ethanol) | Result                      |
|------------------------------------|-----------------------------|
| 10:90                              | Gel formation               |
| 20:80                              | Gel formation               |
| 30:70                              | Gel + Particles             |
| 40:60                              | Particles; poorly dispersed |
| 50:50                              | Particles; well dispersed   |
| 60:40                              | Cloudiness; No particles    |
| 70:30                              | No nucleation               |

\*TEOS at 90 mM concentration was chosen to have a higher TEOS concentration as the starting point

Table 3: Optimization of tetraethyl orthosilicate concentration at 20 mM sodium hydroxide concentration in 1:1 ratio of water-ethanol medium

| TEOS concentration (mM) | Result                                    |
|-------------------------|-------------------------------------------|
| 11.25                   | No particles                              |
| 22.5                    | Cloudiness (no particles) + Gel formation |
| 45                      | Particles                                 |
| 67.5                    | Particles                                 |
| 90                      | Particles; well dispersed                 |
| 112                     | Particles; poorly dispersed               |

Table 4: Optimization of sodium hydroxide concentration at 90 mM tetraethyl orthosilicate concentration in 1:1 ratio of water-ethanol medium

| NaOH concentration (mM) | Result       |
|-------------------------|--------------|
| 4                       | No particles |
| 8                       | No particles |
| 10                      | Particles    |
| 20                      | Particles    |
| 50                      | Gelation     |
| 100                     | Gelation     |

1. S. Liu and M.-Y. Han, *Chemistry*, 2010, 5(1), 36–45.
2. R. P. Bagwe, L. R. Hilliard, and W. Tan, *Langmuir*, 2006, 22(9), 4357–4362.
3. K. J. Klabunde, *Nanoscale Materials in Chemistry*, Wiley-Interscience, New York, NY, USA, 2001.
4. G. A. Silva, *Surgical Neurology*, 2004, 61(3), 216–220.
5. L. L. Hench and J. K. West, *Chem. Rev.*, 1990, 90(1), 33–72.
6. W. Stober, A. Fink, and E. Bohn, *J. Colloid and Interf. Sci.*, 1968, 26(1), 62–69.
7. D. L. Venton, E. Gudipati, *Biochim. Biophys. Acta, Protein Struct. Mol. Enzymol.* 1995, 1250, 126-136.
8. C. O. Kappe and D. Dallinger, *Nat. Rev. Drug Discov.*, 2006, 5, 51–63.
1. A. Umer, S. Naveed, N. Ramzan and M. S. Rafique, *Nano*, 2012, 07, 1230005.
2. I. Bilecka and M. Niederberger, *Nanoscale*, 2010, 2, 1358.
